# Supplementary material for: A novel photosensitized Fenton reaction catalyzed by sandwiched iron in synthetic nontronite
Source: Royal Society of Chemistry journal article supplement (doi:10.1039/c3ra47359g), 2014-01-01
Supplement: c3ra47359g1.pdf [file c3ra47359g1.pdf]

## Electronic Supplementary Information

### A novel photosensitized Fenton reaction catalyzed by sandwiched iron in synthetic nontronite

Renlan Liu, Dongxue Xiao, Yaoguang Guo, Zhaohui Wang\*, Jianshe Liu\*

*State Environmental Protection Engineering Center for Pollution Treatment and Control in  
Textile Industry, College of Environmental Science and Engineering, Donghua University,  
Shanghai, 201620, China*

\*Corresponding author. Tel.: +86-21-6779-2557; fax +86-21-6779-2522.

*E-mail: [zhaohuiwang@dhu.edu.cn](mailto:zhaohuiwang@dhu.edu.cn) (Z. Wang); [liujianshe@dhu.edu.cn](mailto:liujianshe@dhu.edu.cn) (J. Liu)*

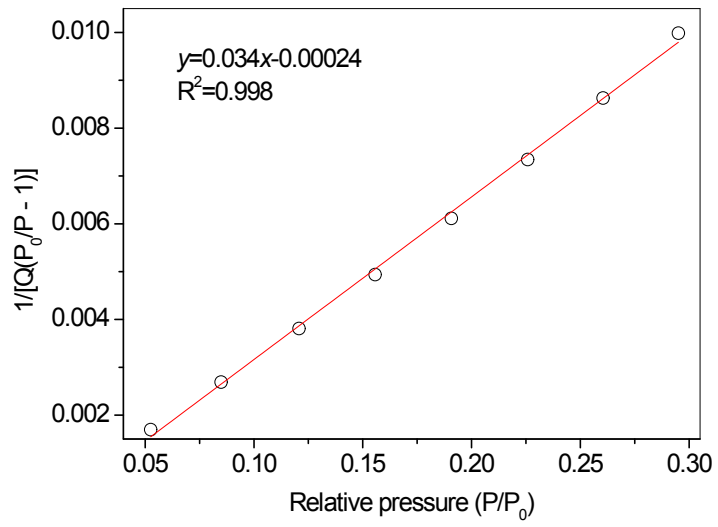

**Fig. 1** BET surface area plot of NAU.

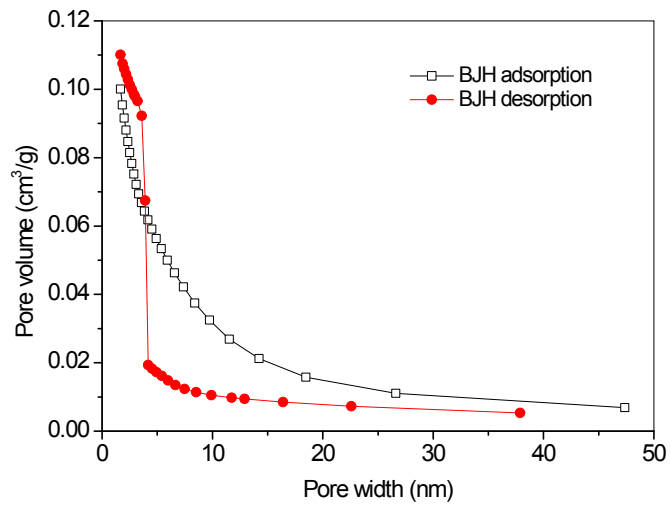

**Fig. 2** Pore volume and pore size distributions of NAU.

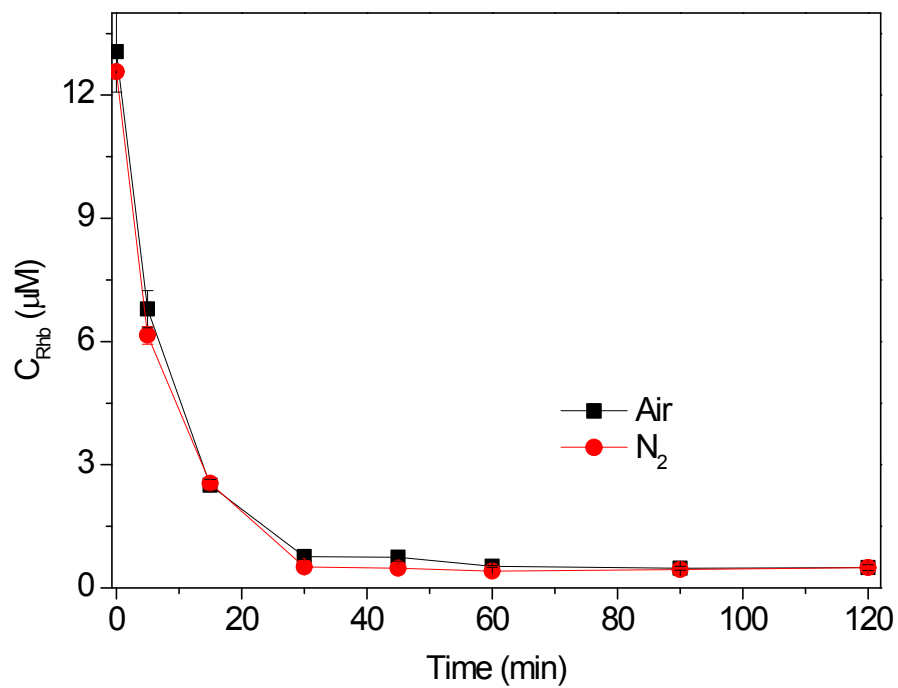

**Fig. 3.** Effect of  $\text{O}_2$  on the photosensitized dye degradation.  $\text{N}_2$  was continuously purged into the suspensions conversion of Rhb throughout the illumination. The experiments were conducted under conditions:  $[\text{RhB}] = 20 \mu\text{M}$ ,  $[\text{H}_2\text{O}_2] = 10 \text{ mM}$ ,  $\text{NAU} = 0.2\text{g/L}$ ,  $\text{pH}=3$ .
